# Supplementary material for: Bacillus subtilis: As an Efficient Bacterial Strain for the Reclamation of Water Loaded with Textile Azo Dye, Orange II
Source: MDPI journal article supplement (doi:10.3390/ijms231810637), 2022-09-13
Supplement: s1 [file s1]

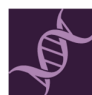

Supplementary Materials

Table S1. Percent degradation of orange II at different concentration.

| Concentration (ppm) | 5     | 10    | 15    | 20    | 25    | 30    | 35    | 40    |
|---------------------|-------|-------|-------|-------|-------|-------|-------|-------|
| % Degradation       | 55.67 | 69.28 | 72.31 | 74.85 | 78.96 | 73.11 | 72.28 | 71.50 |

Table S2. Orange II percent degradation at different pH.

| pH            | 1     | 2     | 3     | 4     | 5     | 6     | 7     | 8     | 9     | 10    | 11    | 12    | 13    | 14    |
|---------------|-------|-------|-------|-------|-------|-------|-------|-------|-------|-------|-------|-------|-------|-------|
| % Degradation | 39.06 | 48.48 | 50.17 | 53.47 | 55.07 | 57.67 | 62.09 | 58.97 | 56.74 | 52.40 | 49.42 | 46.84 | 41.98 | 39.87 |

Table S3. Percentage degradation at different intervals of time.

| Time (Days)   | 1     | 2     | 3     | 4     | 5     | 6     | 9  | 12    | 15    | 18    | 21    |
|---------------|-------|-------|-------|-------|-------|-------|----|-------|-------|-------|-------|
| % Degradation | 26.26 | 34.97 | 54.49 | 54.57 | 54.70 | 54.90 | 55 | 55.10 | 55.18 | 55.27 | 55.38 |

Table S4. Percentage degradation of Orange II at different range of temperature.

| Temperature(°C) | 25    | 30    | 35    | 40    | 45    | 50    |
|-----------------|-------|-------|-------|-------|-------|-------|
| % Degradation   | 33.14 | 52.94 | 63.34 | 50.14 | 46.20 | 43.11 |

Table S5. Percentage degradation of Orange II dye at glucose concentration.

| Concentration(mg/L) | 333.33 | 666.66 | 1000  | 1333.33 | 1666.67 |
|---------------------|--------|--------|-------|---------|---------|
| % Degradation       | 60.57  | 68.68  | 71.66 | 70.83   | 70.01   |

Table S6. Percentage degradation of dye (Orange II) at different concentration of urea.

| Concentration(mg/L) | 333.33 | 666.66 | 1000  | 1333.33 | 1666.67 |
|---------------------|--------|--------|-------|---------|---------|
| % Degradation       | 66.72  | 67.17  | 68.48 | 68.29   | 65.79   |

Table S7. Percent degradation of Orange II at different concentration of sodium chloride.

| Concentration(mg/L) | 333.33 | 666.66 | 1000  | 1333.33 | 1666.67 |
|---------------------|--------|--------|-------|---------|---------|
| % Degradation       | 50.48  | 58.69  | 39.77 | 37.68   | 36.23   |

Table S8. Percent degradation of Orange II by *B.subtilis* using different Redox mediators.

| Concentration (66 mg/L) | Uric Acid | Sodium Benzoate | Hydroquinone | EDTA  |
|-------------------------|-----------|-----------------|--------------|-------|
| % Degradation           | 28.53     | 59.55           | 60.93        | 58.58 |
